# Supplementary material
Source: PubMed Central journal article supplement (PMC6726947)
Supplement: tpmd180962.SD1.pdf [file tpmd180962.SD1.pdf]

**Supplemental Table: Population Attributable Fractions of all Pathogens with Overall Prevalence > 3% in Diarrheal Stools, Stratified by Site**

**Rural:**

| <b>Pathogen</b>                     | <b>Prevalence in diarrheal cases</b> | <b>Unadjusted Odds Ratio</b> | <b>lower CI</b> | <b>upper CI</b> | <b>Unadjusted PAF</b> | <b>lower 95% CI of PAF*</b> | <b>upper 95% CI of PAF*</b> |
|-------------------------------------|--------------------------------------|------------------------------|-----------------|-----------------|-----------------------|-----------------------------|-----------------------------|
| <b>ETEC<sup>β</sup></b>             | 57.6%                                | 0.6740                       | 0.427           | 1.063           | -27.9%                | -77.3%                      | 3.4%                        |
| <b>Giardia</b>                      | 54.7%                                | 0.7600                       | 0.419           | 1.38            | -17.3%                | -75.8%                      | 15.1%                       |
| <b>EAEC<sup>β</sup></b>             | 66.3%                                | 0.7800                       | 0.492           | 1.239           | -18.7%                | -68.5%                      | 12.8%                       |
| <b>Cryptosporidia</b>               | 11.1%                                | 0.3750                       | 0.174           | 0.807           | -18.5%                | -52.7%                      | -2.7%                       |
| <b>EIEC<sup>β</sup> (Shigella)</b>  | 52.3%                                | 1.2000                       | 0.605           | 2.381           | 8.7%                  | -34.1%                      | 30.3%                       |
| <b>Rotavirus</b>                    | 5.8%                                 | 0.4290                       | 0.165           | 1.115           | -7.7%                 | -29.4%                      | 0.6%                        |
| <b>STEC-0157<sup>β</sup></b>        | 18.0%                                | 0.7740                       | 0.454           | 1.319           | -5.3%                 | -21.6%                      | 4.4%                        |
| <b>EPEC<sup>β</sup></b>             | 59.3%                                | 1.1820                       | 0.743           | 1.879           | 9.1%                  | -20.5%                      | 27.7%                       |
| <b>Astrovirus</b>                   | 7.0%                                 | 0.5790                       | 0.276           | 1.217           | -5.1%                 | -18.4%                      | 1.2%                        |
| <b>Norovirus</b>                    | 27.9%                                | 1.3910                       | 0.814           | 2.377           | 7.8%                  | -6.4%                       | 16.2%                       |
| <b>Plesiomonas</b>                  | 8.1%                                 | 1.3000                       | 0.57            | 2.965           | 1.9%                  | -6.1%                       | 5.4%                        |
| <b><i>Clostridium difficile</i></b> | 7.6%                                 | 1.6670                       | 0.606           | 4.586           | 3.0%                  | -4.9%                       | 5.9%                        |
| <b>Salmonella</b>                   | 4.1%                                 | 5.0000                       | 0.584           | 42.797          | 3.3%                  | -2.9%                       | 4.0%                        |
| <b>Adenovirus</b>                   | 15.1%                                | 1.9170                       | 0.954           | 3.852           | 7.2%                  | -0.7%                       | 11.2%                       |
| <b>Campylobacter</b>                | 59.9%                                | 1.7620                       | 1.031           | 3.01            | 25.9%                 | 1.8%                        | 40.0%                       |
| <b>Sapovirus</b>                    | 19.2%                                | 2.7000                       | 1.307           | 5.578           | 12.1%                 | 4.5%                        | 15.8%                       |

**Urban:**

| <b>Pathogen</b>                     | <b>Prevalence in diarrheal cases</b> | <b>Unadjusted Odds Ratio</b> | <b>lower CI</b> | <b>upper CI</b> | <b>Unadjusted PAF</b> | <b>lower 95% CI of PAF*</b> | <b>upper 95% CI of PAF*</b> |
|-------------------------------------|--------------------------------------|------------------------------|-----------------|-----------------|-----------------------|-----------------------------|-----------------------------|
| <b><i>Clostridium difficile</i></b> | 9.3%                                 | 0.1760                       | 0.052           | 0.602           | -43.5%                | -169.4%                     | -6.1%                       |
| <b>EIEC<sup>β</sup> (Shigella)</b>  | 15.7%                                | 0.4550                       | 0.158           | 1.308           | -18.8%                | -83.7%                      | 3.7%                        |

|                              |       |        |       |        |        |        |       |
|------------------------------|-------|--------|-------|--------|--------|--------|-------|
| <b>EPEC<sup>β</sup></b>      | 42.1% | 0.6050 | 0.361 | 1.016  | -27.5% | -74.5% | 0.7%  |
| <b>Giardia</b>               | 7.1%  | 0.6670 | 0.111 | 3.99   | -3.5%  | -56.9% | 5.3%  |
| <b>EAEC<sup>β</sup></b>      | 50.7% | 0.8520 | 0.488 | 1.486  | -8.8%  | -53.2% | 16.6% |
| <b>STEC-0157<sup>β</sup></b> | 8.6%  | 0.4550 | 0.158 | 1.308  | -10.3% | -45.8% | 2.0%  |
| <b>ETEC<sup>β</sup></b>      | 27.9% | 0.7500 | 0.426 | 1.321  | -9.3%  | -37.6% | 6.8%  |
| <b>Plesiomonas</b>           | 1.9%  | 0.6670 | 0.111 | 3.99   | -0.9%  | -14.9% | 1.4%  |
| <b>Astrovirus</b>            | 4.3%  | 1.0000 | 0.25  | 3.998  | 0.0%   | -12.9% | 3.2%  |
| <b>Adenovirus</b>            | 10.7% | 1.3330 | 0.463 | 3.843  | 2.7%   | -12.4% | 7.9%  |
| <b>Sapovirus</b>             | 12.1% | 1.3330 | 0.562 | 3.164  | 3.0%   | -9.4%  | 8.3%  |
| <b>Salmonella</b>            | 2.9%  | 1.5000 | 0.251 | 8.977  | 1.0%   | -8.5%  | 2.5%  |
| <b>Campylobacter</b>         | 20.7% | 2.1110 | 0.955 | 4.666  | 10.9%  | -1.0%  | 16.3% |
| <b>Rotavirus</b>             | 8.6%  | 9.0000 | 1.14  | 71.038 | 7.6%   | 1.1%   | 8.5%  |
| <b>Norovirus</b>             | 39.3% | 2.0000 | 1.053 | 3.799  | 19.7%  | 2.0%   | 29.0% |
| <b>Cryptosporidia</b>        | 5.7%  | N/C*   | N/C   | N/C    | N/C    | N/C    | N/C   |

<sup>β</sup> Enteroaggregative *E. coli* (EAEC), Enteropathogenic *E. coli* (EPEC), Enterotoxigenic *E. coli* (ETEC), Shigella/Enteroinvasive *E. coli* (EIEC), Shiga-like toxin-producing *E. coli* (STEC).

\* N/C = not calculable due to small numbers.
